# Supplementary material for: Rapid SARS-CoV-2 testing in primary material based on a novel multiplex RT-LAMP assay
Source: PubMed Central journal article supplement (PMC7605681; doi:10.1371/journal.pone.0238612), 2020-11-02
Supplement: pone.0238612.s005.pdf [file pone.0238612.s005.pdf]

| Primers                       | Sequence (5'-3')           |                                                                          |
|-------------------------------|----------------------------|--------------------------------------------------------------------------|
| <b>LAMP Orf1a<sup>1</sup></b> | ORF1a-A-F3                 | CTGCACCTCATGGTCATGTT                                                     |
|                               | ORF1a-A-B3                 | AGCTCGTCGCCTAAGTCAA                                                      |
|                               | ORF1a-A-FIP                | GAGGGACAAGGACACCAAGTGTATGGTTGAGCTGGTAGCAGA                               |
|                               | ORF1a-A-BIP                | CCAGTGGCTTACCGCAAGGTTTTAGATCGGCGCCGTAAC                                  |
|                               | ORF1a-A-LF                 | CCGTAAGAACCGGTAATAAAGGAGC                                                |
|                               | ORF1a-A-LB                 | TTCGTAAGAACCGGTAATAAAGGAGC                                               |
| <b>LAMP GeneN<sup>1</sup></b> | GeneN-A-F3                 | TGGCTACTACCGAAGAGCT                                                      |
|                               | GeneN-A-B3                 | TGCAGCATTGTTAGCAGGAT                                                     |
|                               | GeneN-A-FIP                | TCTGGCCCAGTTCCTAGGTAGTCCAGACGAATTCGTGGTGG                                |
|                               | GeneN-A-BIP                | AGACGGCATCATATGGGTTGCACGGGTGCCAATGTGATCT                                 |
|                               | GeneN-A-LF                 | GGACTGAGATCTTTCAATTTACCGT                                                |
|                               | GeneN-A-LB                 | ACTGAGGGAGCCTTGAATACA                                                    |
| <b>LAMP ORF7a</b>             | ORF7a-F3                   | TCTTGGCACTGATAACACTC                                                     |
|                               | ORF7a-B3                   | GATCTGGCACGTAACCTGAT                                                     |
|                               | ORF7a-FIP                  | TCCAGAAGAGCAAGGTTCTTTTAAA-GCTACTTGTGAGCTTTATCACT                         |
|                               | ORF7a-BIP                  | AGCTGATAACAAATTTGCACTGAC-GTTTTACGCCGTCAGGAC                              |
|                               | ORF7a-LF                   | GTTGTACTCTAACACACTCTTGGT                                                 |
|                               | ORF7a-LB                   | GCTTTAGCACTCAATTTGCTTTTGC                                                |
|                               |                            |                                                                          |
| <b>LAMP M GENE</b>            | M-GENE-F3                  | AGTAATAGTTTTCTATTCTTAC                                                   |
|                               | M-GENE-B3                  | AGCCACATCAAGCCTACA                                                       |
|                               | M-GENE-FIP                 | GCCATAACAGCCAGAGGAAAATTAA-TGGATTTGTCTTCTACAATTTGC                        |
|                               | M-GENE-BIP                 | TTAGCTTGTGCTTGTGCTG-ACAAGCCATTGCGATAGC                                   |
|                               | M-GENE-LF                  | CAAAAACCTATTCTGTTGGCATAG                                                 |
|                               | M-GENE-LB                  | CAGAATAAATGGATCACCGGTGGA                                                 |
|                               | M-GENE-LB-2                | GAATAAATGGATCACCGGTGGA                                                   |
| <b>LAMP ORF3a-A</b>           | ORF3a-A-F3                 | CACTTCAGACTATTACCAGCT                                                    |
|                               | ORF3a-A-B3                 | GCTTGTGCTTACAAAGGC                                                       |
|                               | ORF3a-A-FIP                | GTTCTTCAGGCTCATCAACAATTTT-CTCAACTCAATTGAGTACAGACA                        |
|                               | ORF3a-A-BIP                | CCAAATTCACACAATCGACGGTT-TAGTAGTCGTGTCGGTT                                |
|                               | ORF3a-A-LF                 | TGAAGAAGGTAACATGTTCAACACC                                                |
|                               | ORF3a-A-LB                 | CGGAGTTGTTAATCCAGTAATGGAA                                                |
| <b>LAMP ORF3a-B</b>           | ORF3a-B-F3                 | ATTTTGTTCGCGCTACTG                                                       |
|                               | ORF3a-B-B3                 | ACGAGCAAAGGTGTGAG                                                        |
|                               | ORF3a-B-FIP                | CTCTGAAAAACAGCAAGAAGTGCAA-GATACCGATACAAGCCTCAC                           |
|                               | ORF3a-B-BIP                | TAACCCTCAAAAAGAGATGGCAA-CAAAACAACAACAGCAAGTTG                            |
|                               | ORF3a-B-LF                 | ACAATAAGCCATCCGAAAGGGA                                                   |
|                               | ORF3a-B-LB                 | CACTCTCAAGGGTGTTCCT                                                      |
| <b>T7-LAMP-Primers</b>        | GENE-N-T7-FIP              | TCTGGCCCAGTTCCTAGGTAGT TAATACGACTCACTATAGG<br>CCAGACGAATTCGTGGTGG        |
|                               | ORF7-T7-FIP                | TCCAGAAGAGCAAGGTTCTTTTAAA TAATACGACTCACTATAGG<br>GCTACTTGTGAGCTTTATCACT  |
|                               | ORF3a-A-T7-FIP             | GTTCTTCAGGCTCATCAACAATTTT TAATACGACTCACTATAGG<br>CTCAACTCAATTGAGTACAGACA |
| <b>LwaCas13a crRNA</b>        | ORF1ab <sup>2</sup>        | GAUUUAGACUACCCCAAAAACGAAGGGGACUAAAAC<br>CCAACCUCUUCUGUAAUUUUUAAACUUAU    |
|                               | S Gene <sup>2</sup>        | GAUUUAGACUACCCCAAAAACGAAGGGGACUAAAAC<br>GCAGCACCAGCUGUCCAACCUGAAGAAG     |
|                               | Gene-N                     | GAUUUAGACUACCCCAAAAACGAAGGGGACUAAAAC<br>TTGTTAGCACCATAGGGAAGTCCAGCTT     |
|                               | Orf7                       | GAUUUAGACUACCCCAAAAACGAAGGGGACUAAAAC<br>GGAUGAAAUGGUGAAUUGCCUCGUAUG      |
|                               | Orf3                       | GAUUUAGACUACCCCAAAAACGAAGGGGACUAAAAC<br>UGUGAAUUUGGACAUGUUCUUCAGGCUC     |
| <b>RPA Primers</b>            | Orf1ab-Fw_v1 <sup>2</sup>  | GAAATTAATACGACTCACTATAGGGCGAAGTTGTAGGAGACATTA<br>TACTTAAACC              |
|                               | Orf1ab-Rev_v1 <sup>2</sup> | TAGTAAGACTAGAATTGTCTACATAAGCAGC                                          |
|                               | S-RPA-Fw_v1 <sup>2</sup>   | GAAATTAATACGACTCACTATAGGGAGGTTTCAAACCTTACTTGCT<br>TTACATAGA              |
|                               | S-RPA-Rev_v1 <sup>2</sup>  | TCCTAGGTTGAAGATAACCCACATAATAAG                                           |
| <b>Reporter SHERLOCK2</b>     | LF Reporter <sup>2</sup>   | /56-FAM/mArArUrGrGrCmAmArArUrGrGrCmA/3Bio/                               |
|                               |                            |                                                                          |
|                               |                            | <sup>1</sup> Sequence from Zhang et al, medRxiv: 2020.02.26.20028373.    |
|                               |                            | <sup>2</sup> Sequence from the webpage of Feng Zhang @ MIT, Boston, USA  |
