# Supplementary material for: Rapid SARS-CoV-2 testing in primary material based on a novel multiplex RT-LAMP assay
Source: PubMed Central journal article supplement (PMC7605681; doi:10.1371/journal.pone.0238612), 2020-11-02
Supplement: pone.0238612.s006.pdf [file pone.0238612.s006.pdf]

| <b>Characteristics</b>             | <b>SARS-CoV2 qPCR</b> |               |               |
|------------------------------------|-----------------------|---------------|---------------|
|                                    | <b>all</b>            | <b>(+)</b>    | <b>(-)</b>    |
| <i>n, male (%)</i>                 | 171* (56.97)          | 125 (58.40)   | 46 (54.34)    |
| <b>Age groups (n)</b>              |                       |               |               |
| <30                                | 38                    | 27            | 11            |
| 30-45                              | 52                    | 37            | 15            |
| 45-60                              | 46                    | 42            | 4             |
| >60                                | 35                    | 19            | 16            |
| <i>Age, (yr) mean ±SD (all)</i>    | 44.60 ± 18.50         | 44.74 ± 16.34 | 44.22 ± 23.59 |
| <i>Age, (yr) mean ±SD (male)</i>   | 43.37 ± 17.74         | 43.66 ± 16.07 | 42.53 ± 22.28 |
| <i>Age, (yr) mean ±SD (female)</i> | 46.25 ± 19.47         | 46.26 ± 16.76 | 46.23 ± 25.46 |
| <i>Chest CT (n)</i>                | 18                    | 11            | 7             |

\* date of birth was not available for one female patient (who was consequently not included in this table).
